# Supplementary material for: Polysaccharides as Green Fuels for the Synthesis of MgO: Characterization and Evaluation of Antimicrobial Activities
Source: MDPI journal article supplement (doi:10.3390/molecules28010142), 2022-12-24
Supplement: s1 [file s1]

## SUPPLEMENTARY

# Polysaccharides as green fuels for the synthesis of MgO: Characterization and evaluation of antimicrobial activities

Nayara Balaba<sup>1</sup>, Silvia Jaerger<sup>1</sup>, Dienifer F. L. Horsth<sup>1,2</sup>, Julia de O. Primo<sup>1</sup>, Jamille de S. Correa<sup>1</sup>, Carla Bittencourt<sup>2\*</sup>, Cristina M. Zanette<sup>3</sup>, Fauze J. Anaissi<sup>1</sup>

<sup>1</sup> Departamento de Química, Universidade Estadual Do Centro-Oeste, 85040-080 Guarapuava, Brazil

<sup>2</sup> Chimie des Interactions Plasma-Surface (ChIPS), Research Institute for Materials Science and Engineering, University of Mons, 7000 Mons, Belgium

<sup>3</sup> Departamento de Engenharia de Alimentos, Universidade Estadual do Centro-Oeste, 85040-080 Guarapuava, Brazil

\*E-mail: carla.bittencourt@umons.ac.be

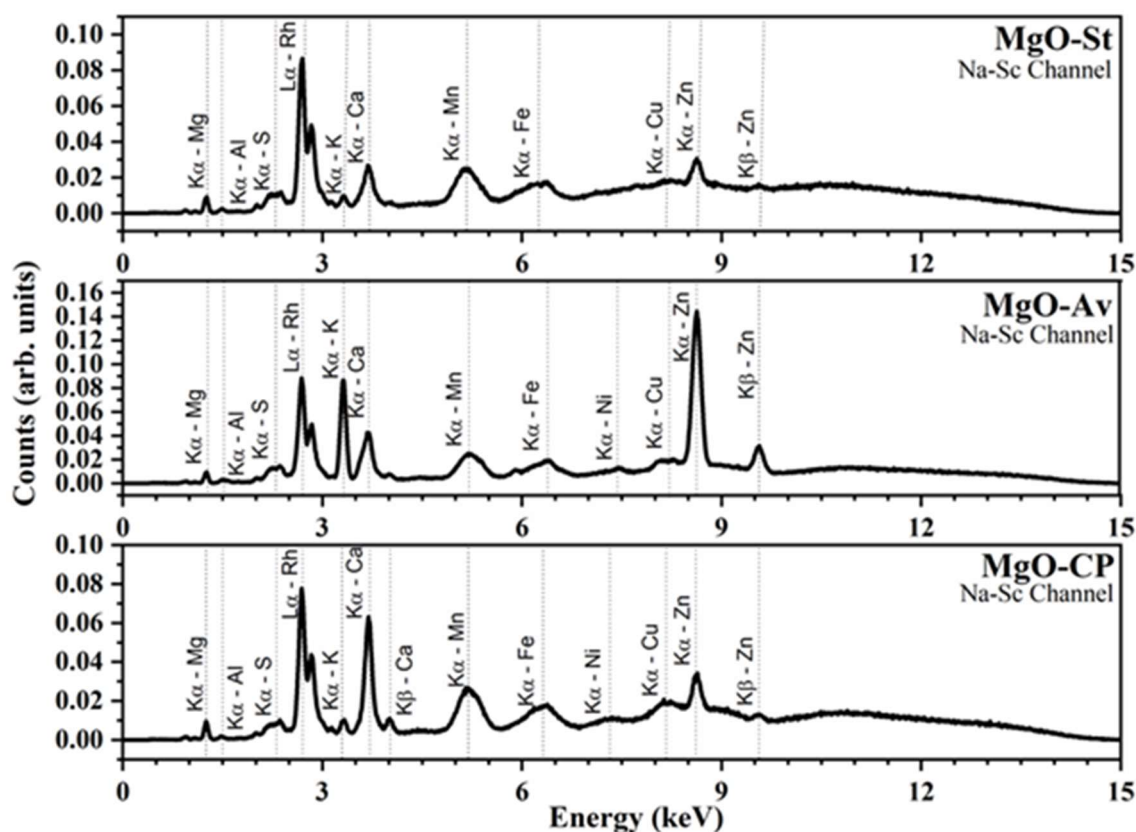

**Figure S1.** Elemental analysis of the MgO samples MgO-ST, MgO-Av, and MgO-CP. The Identification was performed using the Mg  $\text{K}\alpha$  line located at 1.25 keV.

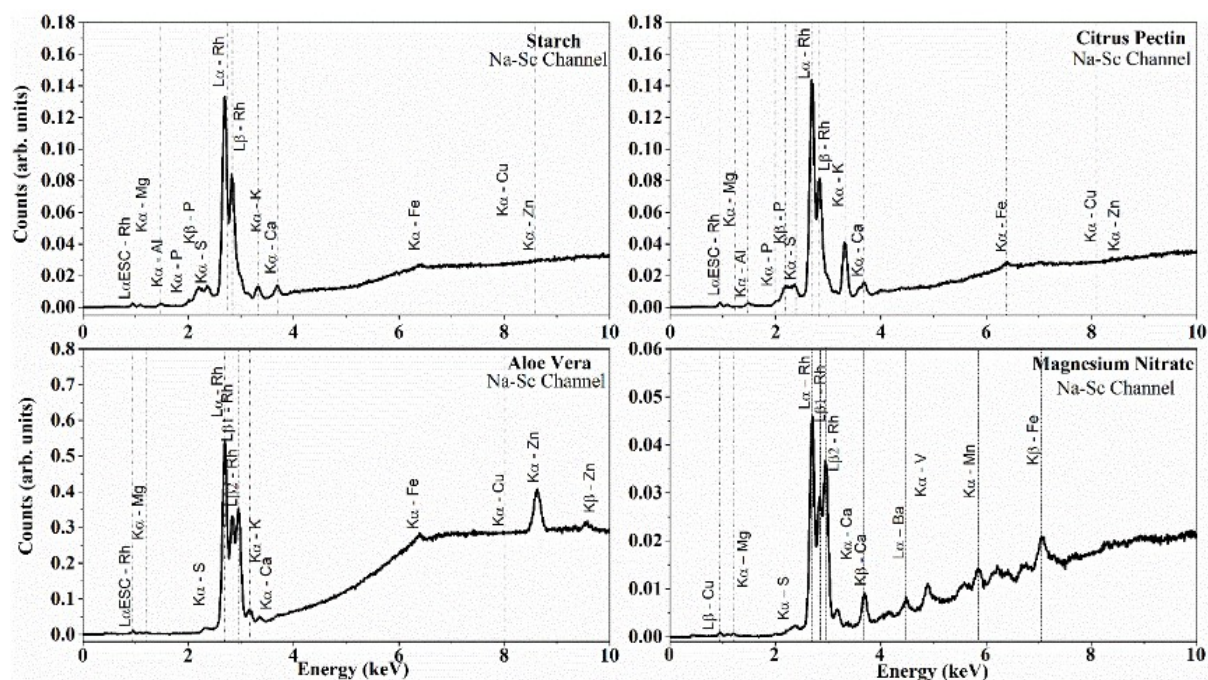

**Figure S2.** Elemental analysis of the organic precursors and magnesium salt. The percentage of Mg presented by the precursors was: 6.6% for starch, 0.1% for Aloe Vera, and 1.7% for citrus pectin. The  $Mg(NO_3)_2 \cdot 6H_2O$  salt used in the three synthetic routes showed a purity of 98% of magnesium. Identification was performed using the Mg  $K\alpha$  line located at 1.25 keV.
